# Supplementary material
Source: Springer Nature journal article supplement (https://www.springermedizin.de/resource/supplementary/13002_2010_219_MOESM5_ESM.pdf/9627408)

Number of traditional healers

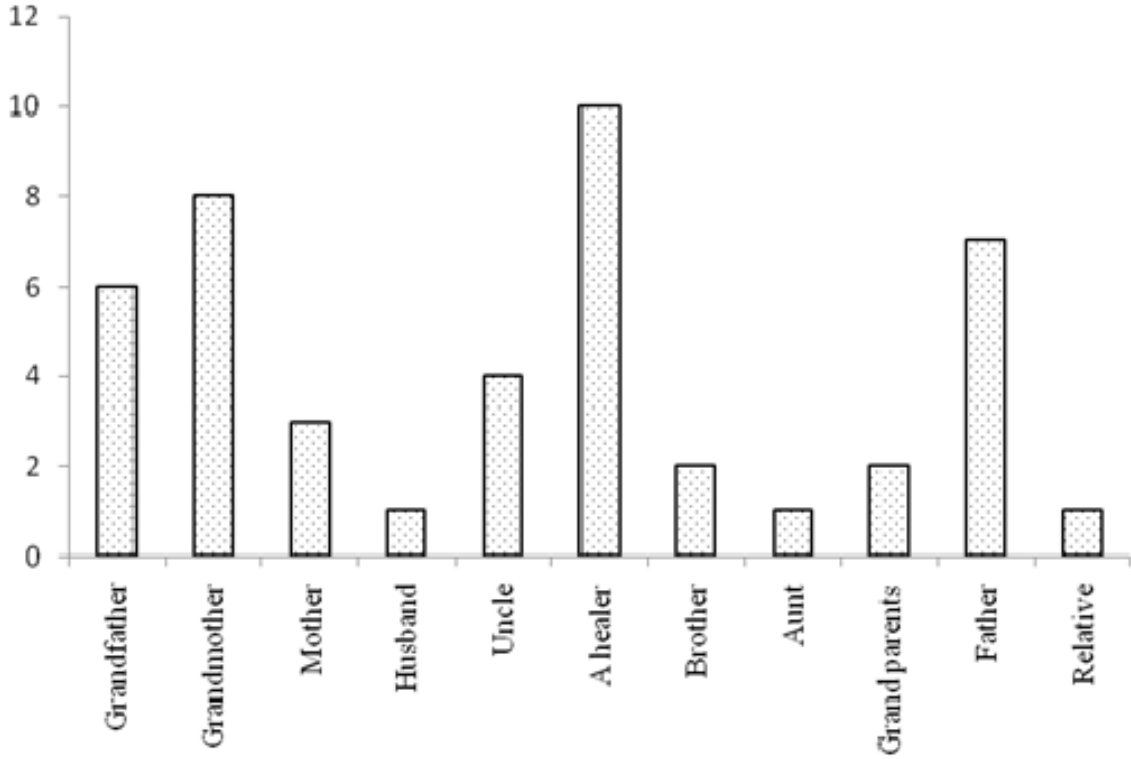

Supplement: MOESM5 [file 9627408]
